# Supplementary material for: Implications of the Onset of Sweating on the Sweat Lactate Threshold
Source: MDPI journal article supplement (doi:10.3390/s23073378), 2023-03-23

**Figure S1.** Sweat lactate sensing device

This figure shows the sweat lactate sensor and the application device (Grace Imaging Inc., Tokyo, Japan). The sweat lactate data were recorded on a mobile application in real-time via a Bluetooth connection.

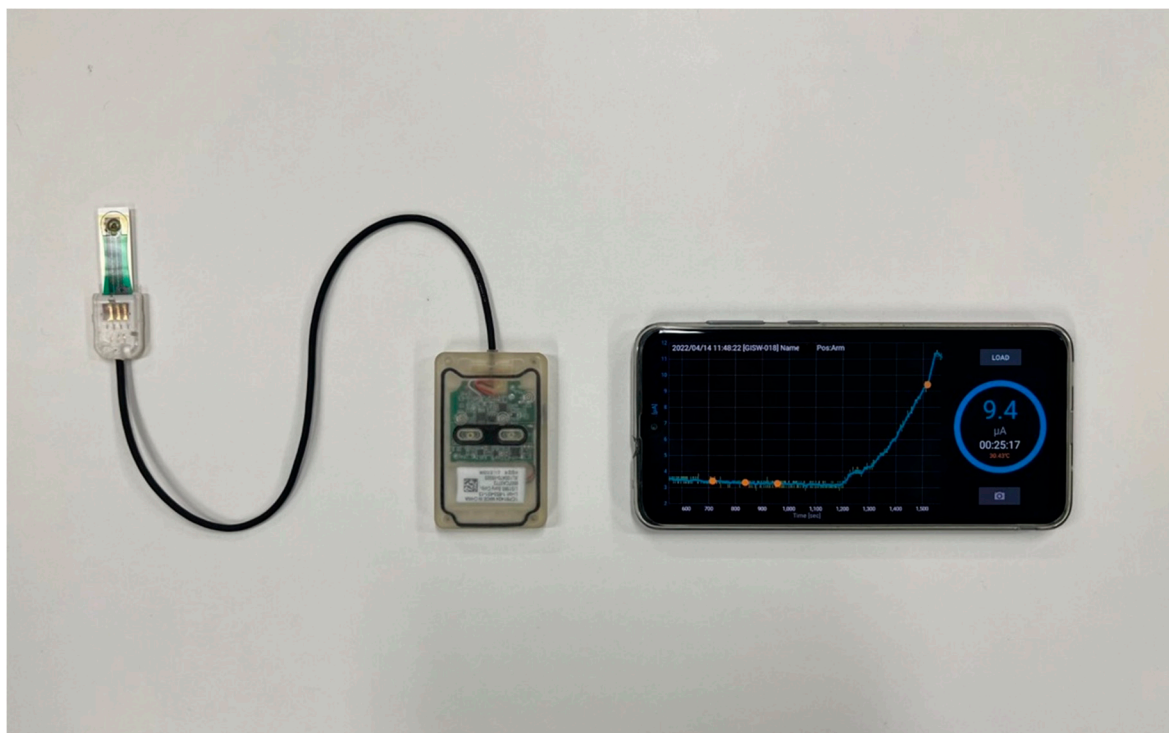

Supplement: s1 [file s1]
